# Supplementary material for: Sequential treatment with 5‐aza‐2′‐deoxycytidine and deacetylase inhibitors reactivates HIV‐1
Source: PubMed Central journal article supplement (PMC4734845; doi:10.15252/emmm.201505557), 2015-12-17
Supplement: EMMM-8-117-s001.pdf [file EMMM-8-117-s001.pdf]

## Table of content

**Appendix Figure S1:** The DNA methylation inhibitor 5-AzadC induces in a dose-dependent manner the MFI of GFP-positive latently-infected T cells.

**Appendix Figure S2:** Metabolic activity is similar in uninfected and in latently-infected cells after treatment by HDACIs.

**Appendix Figure S3:** Sequential 5-AzadC + HDACI treatments induce the MFI of GFP-positive latently-infected T cells.

**Appendix Figure S4:** 5-AzadC + HDACIs treatments do not induce global T-cell activation.

**Appendix Figure S5:** Only the 5-AzadC + Panobinostat and 5-AzadC + Romidepsin treatments induce significant decreases of the cell surface CD4 receptor expression.

**Appendix Table S1:** Representation of mean viral production, fold induction and fold synergy corresponding to Fig3A and 3B.

**Appendix Table S2:** Representation of reactivation status of *ex vivo* cultures of CD8<sup>+</sup>-depleted PBMCs isolated from HIV<sup>+</sup> patients.

**Appendix Table S3:** Representation of mean viral production, fold induction and fold synergy corresponding to Fig4A and 4B.

**Appendix Table S4:** Representation of patients' characteristics

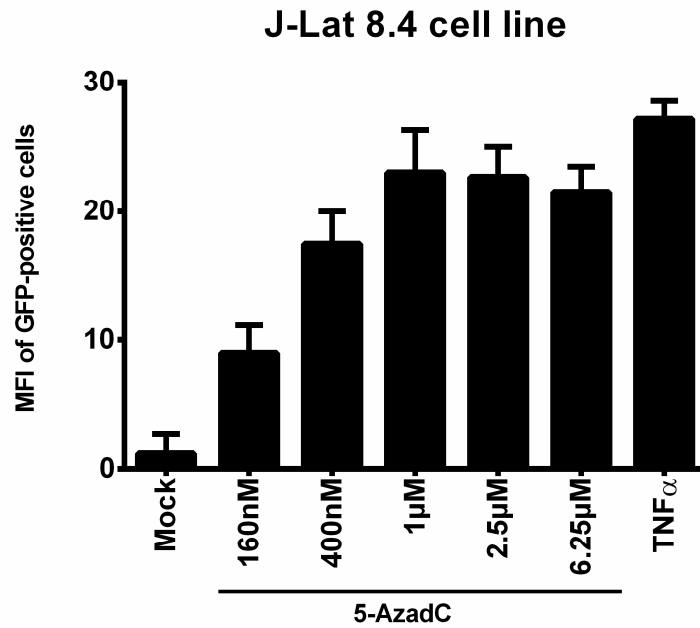

**Appendix Figure S1: The DNA methylation inhibitor 5-AzadC induces in a dose-dependent manner the MFI of GFP-positive latently-infected T cells.**

J-Lat 8.4 cell line was mock-treated or treated with increasing concentrations of 5-AzadC. At 72 h post-treatment, FACS analyses were performed and the median fluorescence intensity (MFI) of GFP<sup>+</sup> positive cells was analysed. Means and standard errors of the means from three independent biological duplicates (n=6) are indicated.

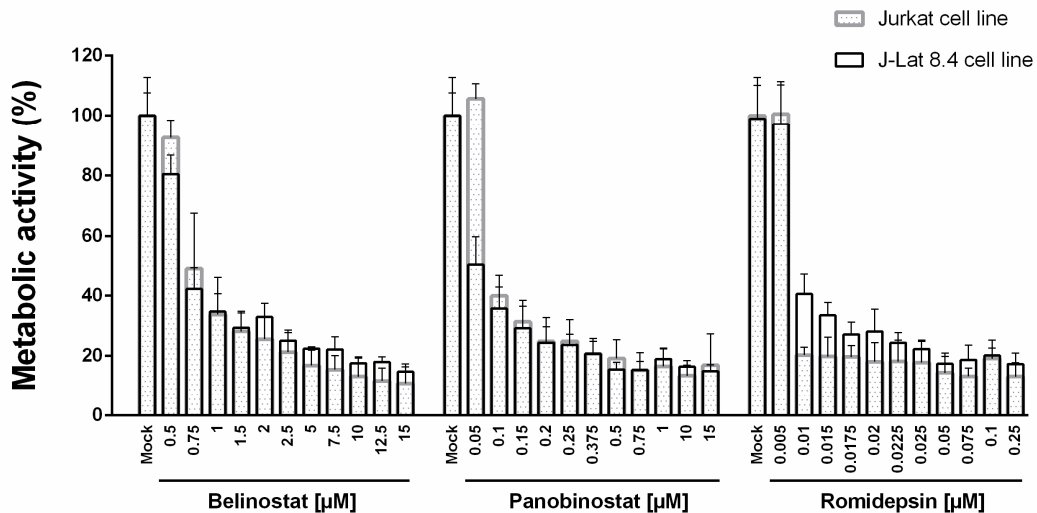

**Appendix Figure S2: Metabolic activity is similar in uninfected and in latently-infected cells after treatment by HDACIs.**

J-Lat 8.4 and Jurkat cells were mock-treated or treated with increasing concentrations of HDACIs. At 24 h post-treatment, metabolic activity was assessed by a WST-1 assay. Means and standard errors of the means from three independent biological duplicates (n=6) are indicated. The results obtained with mock-treated cells were arbitrarily set at a value of 100%.

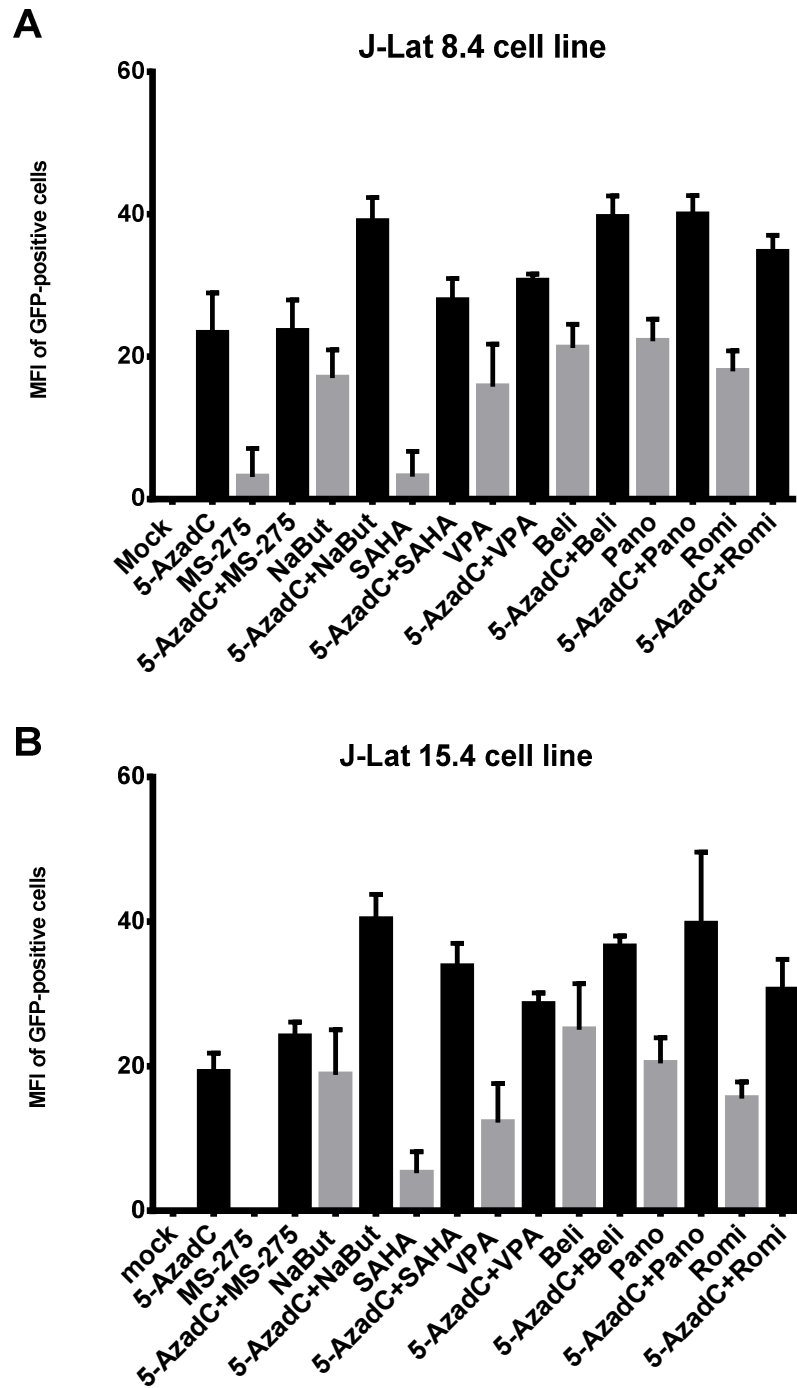

**Appendix Figure S3: Sequential 5-AzadC + HDACi treatments induce the MFI of GFP-positive latently-infected T cells.**

A-B J-Lat 8.4 (A) and J-Lat 15.4 (B) cells were mock-treated or treated with 5-AzadC. At 48 h post-treatment, HDACi were then added for 24 h. At 72 h 5-AzadC post-treatment, FACS analyses were performed and the median fluorescence intensity (MFI) of GFP<sup>+</sup> positive cells was analyzed. Means and standard errors of the means from three independent biological duplicates (n=6) are indicated.

## HIV negative donors

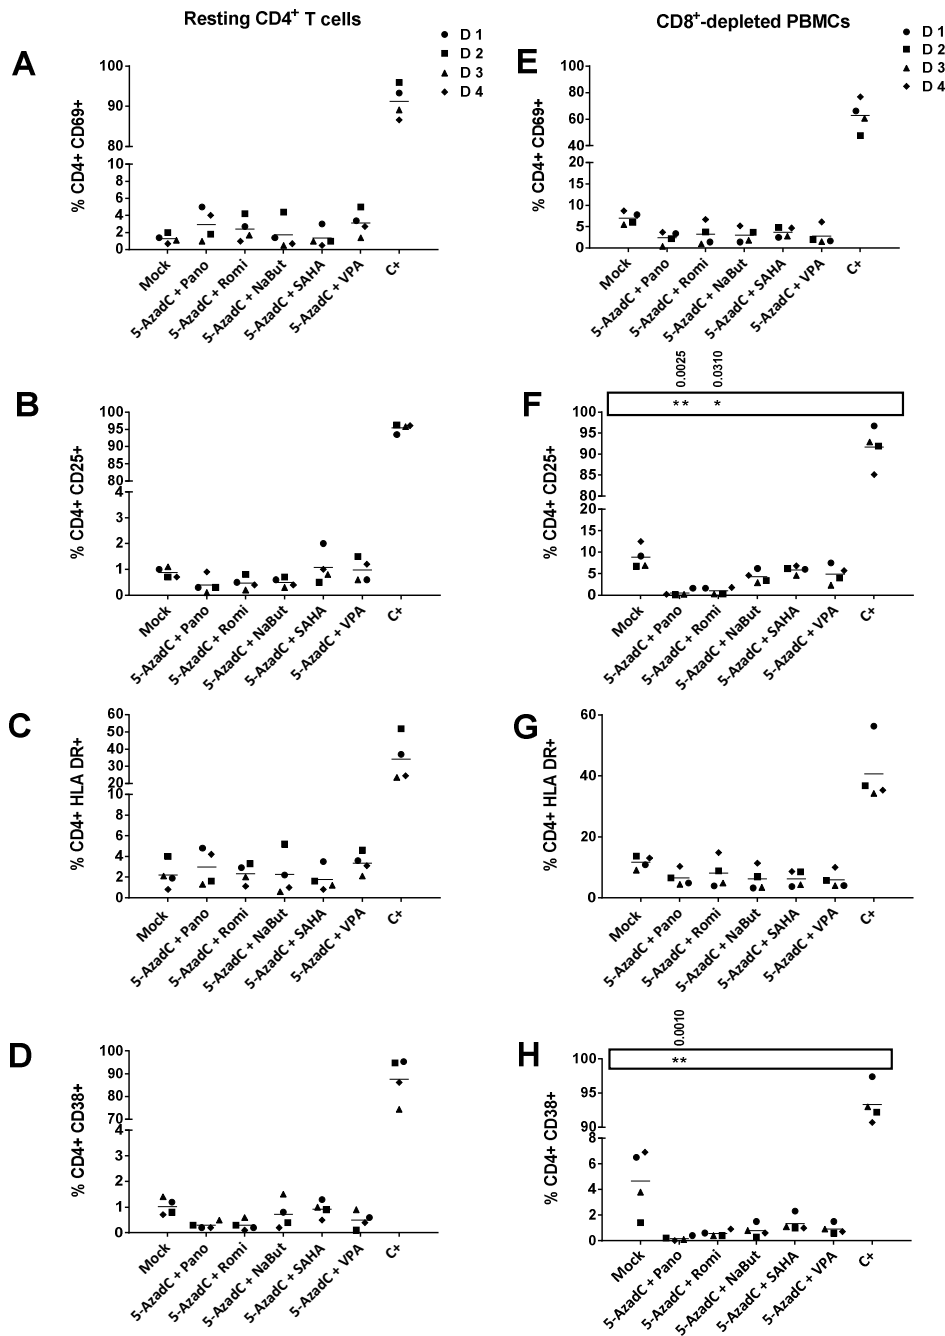

**Appendix Figure S4: 5-AzadC + HDACIs treatments do not induce global T-cell activation.**

A-H One night after cell purification, CD8<sup>+</sup>-depleted PBMCs (E-H) or HLA DR<sup>-</sup> CD69<sup>-</sup> CD25<sup>-</sup> CD4<sup>+</sup> T cells (A-D) from 4 HIV negative donors were mock-treated or treated with 5-AzadC. Three days post-treatment, 1/3 of medium was replaced and HDACIs were added in the cell cultures. The activation status of CD4<sup>+</sup> T cell subset was assessed 6 days after treatment by flow cytometry analysis of cellular activation markers relative to mock treatment before 5-AzadC stimulation corresponding to day 0. Data were represented as dot plots where means are represented by a line. Nonparametric one-way ANOVA for independent samples (Kruskal-Wallis) followed by paired comparisons between each treated condition and the mock-treated condition (Mann-Whitney test) are performed.

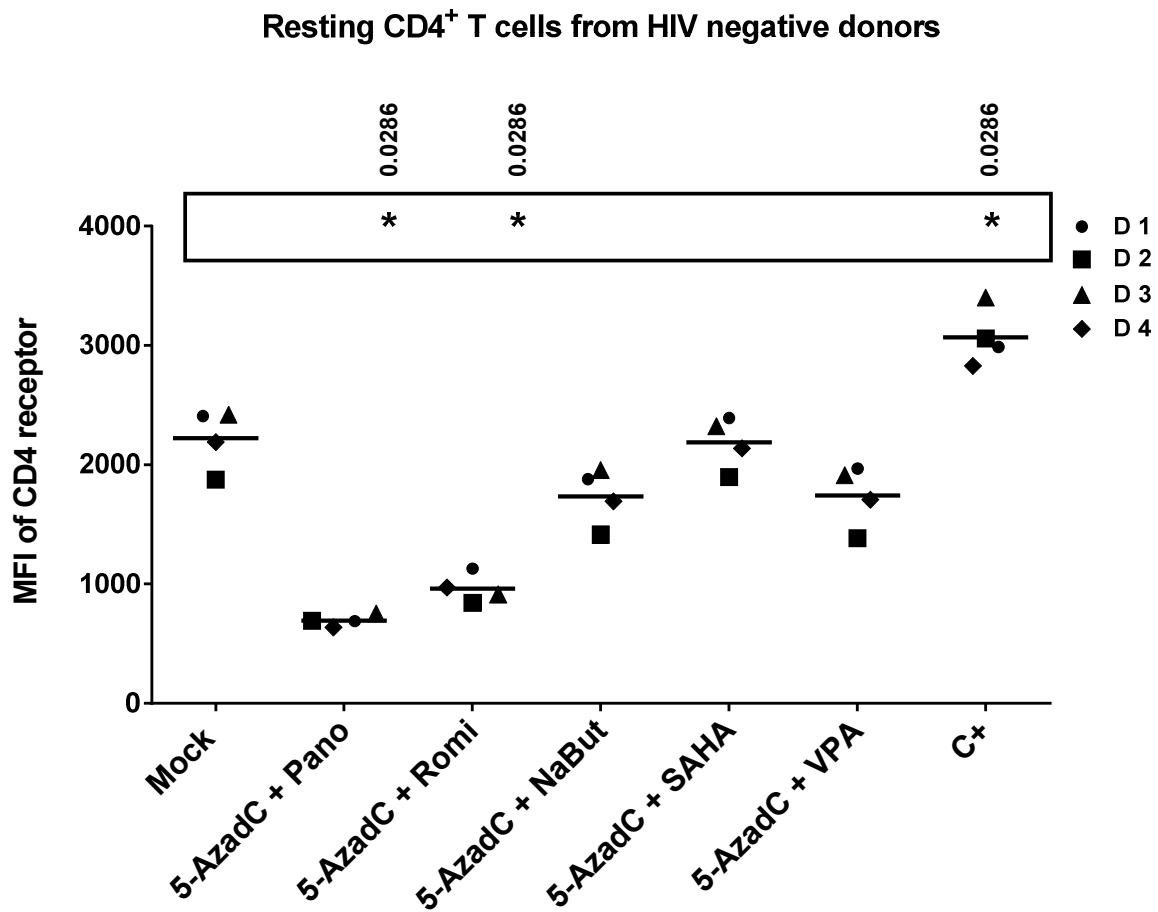

**Appendix Figure S5: Only the 5-AzadC + Panobinostat and 5-AzadC + Romidepsin treatments induce significant decreases of the cell surface CD4 receptor expression.**

One night after cell purification, HLA DR<sup>-</sup> CD69<sup>-</sup> CD25<sup>-</sup> CD4<sup>+</sup> T cells from 4 HIV negative donors were mock-treated or treated with 5-AzadC. Three days post-treatment, 1/3 of medium was replaced and HDACIs were added in the cultures. The median fluorescence intensity (MFI) of CD4 receptor of total CD4<sup>+</sup> T cell subset was assessed 6 days after treatment by flow cytometry analysis relative to mock treatment before 5-AzadC stimulation corresponding to day 0. Data were represented by dot plot where means are presented with a line. Nonparametric one-way ANOVA for independent samples (Kruskal-Wallis) followed by paired comparisons between each treated condition and the mock-treated condition (Mann-Whitney test) are performed.

**Appendix Table S1: Representation of mean viral production, fold induction and fold synergy corresponding to Fig3A and 3B.**

|                                                         | Mean of p24 levels (pg/ml) | Fold induction | Fold synergy |
|---------------------------------------------------------|----------------------------|----------------|--------------|
| <b>24 h of 5-AzadC including 24 h of SAHA treatment</b> |                            |                |              |
| Mock                                                    | 6.48                       | 1.00           |              |
| 5-AzadC                                                 | 11.93                      | 1.84           |              |
| SAHA                                                    | 28.37                      | 4.38           |              |
| 5-AzadC + SAHA                                          | 21.52                      | 3.32           | 0.53         |
| <b>48 h of 5-AzadC including 24 h of SAHA treatment</b> |                            |                |              |
| Mock                                                    | 8.49                       | 1.00           |              |
| 5-AzadC                                                 | 9.94                       | 1.17           |              |
| SAHA                                                    | 6.86                       | 0.81           |              |
| 5-AzadC + SAHA                                          | 72.38                      | 8.52           | 4.31         |
| <b>72 h of 5-AzadC including 24 h of SAHA treatment</b> |                            |                |              |
| Mock                                                    | 9.78                       | 1.00           |              |
| 5-AzadC                                                 | 20.43                      | 2.09           |              |
| SAHA                                                    | 13.03                      | 1.33           |              |
| 5-AzadC + SAHA                                          | 101.83                     | 10.41          | 3.04         |
| <b>72 h of 5-AzadC including 24 h of SAHA treatment</b> |                            |                |              |
| Mock                                                    | 10.20                      | 1.00           |              |
| 5-AzadC                                                 | 19.45                      | 1.91           |              |
| SAHA                                                    | 13.57                      | 1.33           |              |
| 5-AzadC + SAHA                                          | 155.95                     | 15.29          | 4.72         |
| <b>72 h of 5-AzadC including 48 h of SAHA treatment</b> |                            |                |              |
| Mock                                                    | 12.37                      | 1.00           |              |
| 5-AzadC                                                 | 24.72                      | 2.00           |              |
| SAHA                                                    | 72.32                      | 5.85           |              |
| 5-AzadC + SAHA                                          | 444.48                     | 35.93          | 4.58         |
| <b>72 h of 5-AzadC including 72 h of SAHA treatment</b> |                            |                |              |
| Mock                                                    | 10.41                      | 1.00           |              |
| 5-AzadC                                                 | 26.85                      | 2.58           |              |
| SAHA                                                    | 64.40                      | 6.19           |              |
| 5-AzadC + SAHA                                          | 940.85                     | 90.38          | 10.31        |

**Appendix Table S2: Representation of reactivation status of *ex vivo* cultures of CD8<sup>+</sup>-depleted PBMCs isolated from HIV<sup>+</sup> patients.**

| CD8 <sup>+</sup> -depleted PBMCs                                                                  | Concentration of HIV RNA in culture supernatants after six days of treatment (copies/ml) |         |      |                |                                |
|---------------------------------------------------------------------------------------------------|------------------------------------------------------------------------------------------|---------|------|----------------|--------------------------------|
|                                                                                                   | mock                                                                                     | 5-AzadC | SAHA | 5-AzadC + SAHA | Positive control<br>αCD2+αCD28 |
| S1                                                                                                | ND                                                                                       | ND      | ND   | ND             | ND                             |
| S2                                                                                                | 64                                                                                       | ND      | 330  | 316            | 1151                           |
| S3                                                                                                | ND                                                                                       | ND      | ND   | ND             | 6158                           |
| S4                                                                                                | ND                                                                                       | ND      | 1089 | ND             | 1659                           |
| S5                                                                                                | ND                                                                                       | ND      | ND   | ND             | ND                             |
| S6                                                                                                | ND                                                                                       | ND      | ND   | ND             | 12311                          |
| S7                                                                                                | ND                                                                                       | ND      | ND   | ND             | ND                             |
| S8                                                                                                | ND                                                                                       | ND      | ND   | ND             | 436                            |
| S9                                                                                                | 1116                                                                                     | ND      | 2291 | ND             | 5027                           |
| S10                                                                                               | ND                                                                                       | ND      | ND   | ND             | ND                             |
| S11                                                                                               | ND                                                                                       | ND      | ND   | ND             | 1733                           |
| S12                                                                                               | ND                                                                                       | ND      | ND   | ND             | 572                            |
| S13                                                                                               | ND                                                                                       | ND      | ND   | ND             | 4502                           |
| S14                                                                                               | ND                                                                                       | ND      | ND   | ND             | 7418                           |
| S15                                                                                               | ND                                                                                       | ND      | ND   | ND             | 1141                           |
| S16                                                                                               | ND                                                                                       | ND      | ND   | ND             | 1303                           |
| S17                                                                                               | 573                                                                                      | 54      | ND   | 1508           | 1486                           |
| S18                                                                                               | 75                                                                                       | ND      | ND   | 90             | 568                            |
| S19                                                                                               | ND                                                                                       | ND      | ND   | ND             | ND                             |
| S20                                                                                               | ND                                                                                       | ND      | 267  | 55             | 1237                           |
| S21                                                                                               | ND                                                                                       | ND      | ND   | 261            | 8402                           |
| S22                                                                                               | ND                                                                                       | 255     | ND   | 164            | 159                            |
| S23                                                                                               | 2803                                                                                     | ND      | 653  | ND             | ND                             |
| S24                                                                                               | ND                                                                                       | 70      | ND   | ND             | 6074                           |
| <b>Number of Reactivated patient's cell cultures with extracellular HIV RNA &gt; 40 copies/ml</b> | 5                                                                                        | 3       | 5    | 6              | 18                             |
| <b>Number of tested patient samples</b>                                                           | 24                                                                                       | 24      | 24   | 24             | 24                             |
| <b>% of reactivated cultures</b>                                                                  | 20.8                                                                                     | 12.5    | 20.8 | 25.0           | 75.0                           |

One night after cell purification, CD8<sup>+</sup>-depleted PBMCs were mock-treated or treated with 5-AzadC (1μM) and SAHA (1μM) alone or in combination as indicated. Six days after treatment, the concentration of viral RNA in culture supernatants was determined (in copies/ml; ND means undetectable). The cultures highlighted in gray showed a higher viral production with the LRA combination than with the corresponding LRAs alone, while the cultures highlighted in black were reactivated only by the combinatory treatment and not by the LRA individually.

**Appendix Table S3: Representation of mean viral production, fold induction and fold synergy corresponding to Fig4A and 4B.**

| J-Lat 8.4        | Mean of p24 levels (pg/ml) | Fold induction | Fold synergy |
|------------------|----------------------------|----------------|--------------|
| Mock             | 24.68                      | 1.00           |              |
| 5-AzadC          | 71.48                      | 2.90           |              |
| MS-275           | 29.37                      | 1.19           |              |
| 5-AzadC + MS-275 | 117.24                     | 4.75           | 1.16         |
| NaBut            | 377.67                     | 15.31          |              |
| 5-AzadC + NaBut  | 5,140.81                   | 208.34         | 11.45        |
| SAHA             | 36.24                      | 1.47           |              |
| 5-AzadC + SAHA   | 1,552.86                   | 62.93          | 14.42        |
| VPA              | 208.67                     | 8.46           |              |
| 5-AzadC + VPA    | 2,139.30                   | 86.70          | 7.64         |
| Beli             | 390.41                     | 15.82          |              |
| 5-AzadC + Beli   | 9,751.18                   | 395.18         | 21.11        |
| Pano             | 2,221.01                   | 90.01          |              |
| 5-AzadC + Pano   | 16,083.85                  | 651.82         | 7.02         |
| Romi             | 2,510.18                   | 101.73         |              |
| 5-AzadC + Romi   | 10,996.88                  | 445.67         | 4.26         |

  

| J-Lat 15.4       | Mean of p24 levels (pg/ml) | Fold induction | Fold synergy |
|------------------|----------------------------|----------------|--------------|
| Mock             | 12.85                      | 1.00           |              |
| 5-AzadC          | 147.94                     | 11.51          |              |
| MS-275           | 12.70                      | 0.99           |              |
| 5-AzadC + MS-275 | 265.25                     | 20.63          | 1.65         |
| NaBut            | 46.43                      | 3.61           |              |
| 5-AzadC + NaBut  | 2,669.30                   | 207.65         | 13.73        |
| SAHA             | 10.31                      | 0.80           |              |
| 5-AzadC + SAHA   | 1,507.78                   | 117.30         | 9.53         |
| VPA              | 17.18                      | 1.34           |              |
| 5-AzadC + VPA    | 1,013.42                   | 78.84          | 6.14         |
| Beli             | 26.37                      | 2.05           |              |
| 5-AzadC + Beli   | 3,116.47                   | 242.44         | 17.88        |
| Pano             | 202.99                     | 15.79          |              |
| 5-AzadC + Pano   | 4,327.09                   | 336.62         | 12.33        |
| Romi             | 174.04                     | 13.54          |              |
| 5-AzadC + Romi   | 3,279.84                   | 255.15         | 10.19        |



Appendix Table S4: Representation of patients' characteristics

| Cell types                                                                       | Patients | Year of birth | Year of HIV diagnostic | HIV subtype | CD4 <sup>+</sup> Nadir | Year of 1st treatment | Year of undetectable status | Year of blood sampling | CD4 <sup>+</sup> T count at last point | Last treatment       | Year of last treatment administration |
|----------------------------------------------------------------------------------|----------|---------------|------------------------|-------------|------------------------|-----------------------|-----------------------------|------------------------|----------------------------------------|----------------------|---------------------------------------|
| CD8 <sup>+</sup> -depleted PBMCs                                                 | S1       | 1951          | 2000                   | NA          | NA                     | 2001                  | 2002                        | 2009                   | 857                                    | KVX NVP              | 2006                                  |
|                                                                                  | S2       | 1963          | 1988                   | NA          | NA                     | 1991                  | 2008                        | 2009                   | 593                                    | 3TC DDI RTV FAPV MVC | 2005                                  |
|                                                                                  | S3       | 1945          | 2006                   | NA          | NA                     | 2006                  | 2006                        | 2009                   | 550                                    | CBV RTV FAPV         | 2006                                  |
|                                                                                  | S4       | 1958          | 1995                   | NA          | NA                     | 1995                  | 2004                        | 2009                   | 1328                                   | DDI RTV ATV NVP      | 2004                                  |
|                                                                                  | S5       | 1944          | 1986                   | NA          | NA                     | 1987                  | 2008                        | 2009                   | NA                                     | TRU RTV ATV          | 2009                                  |
|                                                                                  | S6       | 1957          | 2001                   | NA          | NA                     | 2001                  | 2001                        | 2009                   | 585                                    | AZT 3TC EFV          | 2005                                  |
|                                                                                  | S7       | 1961          | 1998                   | NA          | NA                     | 1998                  | 1998                        | 2009                   | 768                                    | TZV                  | 2002                                  |
|                                                                                  | S8       | 1970          | 1992                   | NA          | NA                     | 1992                  | 2003                        | 2009                   | 507                                    | ABC TDF ATV          | 2003                                  |
|                                                                                  | S9       | 1946          | 1988                   | NA          | NA                     | 1994                  | 2007                        | 2009                   | 697                                    | TRU RTV FAPV         | 2009                                  |
|                                                                                  | S10      | 1960          | 1995                   | NA          | NA                     | 1997                  | 2003                        | 2009                   | 706                                    | TRU RTV FAPV         | 2009                                  |
|                                                                                  | S11      | 1956          | 1995                   | NA          | NA                     | 1996                  | 2002                        | 2009                   | NA                                     | TRU LPV              | 2009                                  |
|                                                                                  | S12      | 1967          | 1995                   | NA          | NA                     | 1996                  | 2001                        | 2009                   | 791                                    | 3TC TDF RTV ATV      | 2004                                  |
|                                                                                  | S13      | 1963          | 1996                   | NA          | NA                     | 1996                  | 2001                        | 2009                   | 1059                                   | 3TC TDF RTV FAPV     | 2005                                  |
|                                                                                  | S14      | 1965          | 1996                   | NA          | NA                     | 1996                  | 2007                        | 2009                   | 1089                                   | TRU RTV FAPV         | 2009                                  |
|                                                                                  | S15      | 1957          | 1991                   | NA          | NA                     | 1991                  | 1999                        | 2009                   | 751                                    | 3TC ABC EFV          | 2004                                  |
|                                                                                  | S16      | 1971          | 2001                   | NA          | NA                     | 2001                  | 2002                        | 2009                   | NA                                     | TRU NVP              | 2009                                  |
|                                                                                  | S17      | 1976          | 2006                   | NA          | NA                     | 2006                  | 2006                        | 2009                   | 984                                    | TRU LPV              | 2009                                  |
|                                                                                  | S18      | 1986          | 1996                   | NA          | NA                     | 1996                  | 2002                        | 2009                   | 930                                    | TDF RTV ATV EFV      | 2004                                  |
|                                                                                  | S19      | 1966          | 1996                   | NA          | NA                     | 1996                  | 2003                        | 2009                   | 1303                                   | AZT 3TC ABC          | 2000                                  |
|                                                                                  | S20      | 1967          | 2006                   | NA          | NA                     | 2006                  | 2007                        | 2009                   | 1047                                   | TDF FTC ATC          | 2006                                  |
|                                                                                  | S21      | 1977          | 2005                   | NA          | NA                     | 2005                  | 2005                        | 2009                   | 607                                    | TDF FTC EFV          | 2006                                  |
|                                                                                  | S22      | 1955          | 2001                   | NA          | NA                     | 2005                  | 2005                        | 2009                   | 770                                    | 3TC TDF EFV          | 2005                                  |
|                                                                                  | S23      | 1947          | 1998                   | NA          | NA                     | 1998                  | 2007                        | 2009                   | 881                                    | RTV ATV              | 2000                                  |
|                                                                                  | S24      | 1960          | 2000                   | NA          | NA                     | 2000                  | 2006                        | 2009                   | 555                                    | 3TC TDF LPV NVP      | 2008                                  |
|                                                                                  | X1       | 1950          | 1999                   | NA          | 290                    | 2000                  | 2000                        | 2014                   | 948                                    | ETV                  | 2002                                  |
|                                                                                  | X2       | 1961          | 1997                   | B           | 224                    | 1999                  | 2009                        | 2014                   | 590                                    | TRU RTV RLT          | 2011                                  |
|                                                                                  | X3       | 1960          | 1997                   | NA          | 185                    | 1997                  | 2003                        | 2014                   | 428                                    | ATR                  | 2010                                  |
|                                                                                  | X4       | 1963          | 2006                   | NA          | 256                    | 2006                  | 2006                        | 2014                   | 633                                    | TRU ETV RLT          | 2009                                  |
|                                                                                  | X5       | 1971          | 1997                   | D           | 255                    | 1997                  | 2009                        | 2014                   | 786                                    | CBV RLT MVC          | 2009                                  |
|                                                                                  | X6       | 1969          | 2011                   | F2          | 364                    | 2012                  | 2012                        | 2014                   | 723                                    | KVX RTV ATV          | 2012                                  |
|                                                                                  | X7       | 1969          | 1998                   | NA          | 138                    | 1999                  | 2012                        | 2014                   | 723                                    | KVX RTV ATV          | 2012                                  |
|                                                                                  | X8       | 1973          | 2005                   | NA          | 71                     | 2005                  | 2005                        | 2014                   | 513                                    | TRU RTV FAPV         | 2009                                  |
|                                                                                  | X9       | 1963          | 1996                   | NA          | 360                    | 1996                  | 1998                        | 2014                   | 777                                    | KVX ATV              | 2014                                  |
|                                                                                  | X10      | 1951          | 1990                   | NA          | 144                    | 1991                  | 1997                        | 2014                   | 629                                    | TRU NVP              | 2014                                  |
| X11                                                                              | 1976     | 2005          | NA                     | 422         | 2012                   | 2012                  | 2014                        | 603                    | TRU ATV RTV                            | 2014                 |                                       |
| X12                                                                              | 1947     | 1998          | B                      | 151         | 1998                   | 2006                  | 2014                        | 881                    | RTV ATV                                | 2009                 |                                       |
| X13                                                                              | 1959     | 2000          | B                      | 193         | 2000                   | 2000                  | 2014                        | 547                    | TDF FTC EFV                            | 2011                 |                                       |
| X14                                                                              | 1972     | 2000          | NA                     | 146         | 2000                   | 2002                  | 2014                        | 625                    | TDF FTC NVP                            | 2009                 |                                       |
| X15                                                                              | 1967     | 2006          | NA                     | 289         | 2006                   | 2006                  | 2014                        | 1,175                  | EVP                                    | 2011                 |                                       |
| X16                                                                              | 1966     | 2007          | NA                     | 371         | 2010                   | 2011                  | 2014                        | 739                    | TRU RTV ATV                            | 2011                 |                                       |
| X17                                                                              | 1968     | 2008          | NA                     | 192         | 2008                   | 2008                  | 2014                        | 354                    | ATR                                    | 2010                 |                                       |
| X18                                                                              | 1972     | 1996          | NA                     | 373         | 1997                   | 2009                  | 2014                        | 1,015                  | ATR                                    | 2010                 |                                       |
| X19                                                                              | 1980     | 2006          | NA                     | 230         | 2006                   | 2006                  | 2014                        | 623                    | KVX NVP                                | 2012                 |                                       |
| HLA DR <sup>-</sup> CD25 <sup>-</sup> CD69 <sup>-</sup> CD4 <sup>+</sup> T cells | X20      | 1948          | 2009                   | NA          | 354                    | 2009                  | 2009                        | 2014                   | 817                                    | KVX NVP              | 2013                                  |
|                                                                                  | X21      | 1955          | 2000                   | NA          | 157                    | 2000                  | 2000                        | 2014                   | 579                                    | TRU ATV              | 2009                                  |
|                                                                                  | X22      | 1978          | 1996                   | NA          | 0                      | 1996                  | 2010                        | 2014                   | 493                                    | TRU KLT              | 2009                                  |
|                                                                                  | X23      | 1967          | 1992                   | NA          | 362                    | 1994                  | 2000                        | 2014                   | 845                                    | TRU NVP              | 2009                                  |
|                                                                                  | X24      | 1975          | 2004                   | B           | 292                    | 2006                  | 2006                        | 2014                   | 561                                    | ATR                  | 2010                                  |
|                                                                                  | X25      | 1959          | 2009                   | B           | 629                    | 2009                  | 2009                        | 2014                   | 994                                    | TDF FTC EFV          | 2010                                  |
|                                                                                  | X26      | 1970          | 1996                   | B           | 331                    | 1998                  | 2010                        | 2014                   | 1,079                                  | KVX RTV ATV          | 2010                                  |
|                                                                                  | X27      | 1976          | 2004                   | NA          | 288                    | 2007                  | 2007                        | 2014                   | 819                                    | DRV RTR              | 2014                                  |
|                                                                                  | X28      | 1945          | 1988                   | B           | 9                      | 1997                  | 2002                        | 2014                   | 491                                    | RTV DRV RLT          | 2011                                  |
|                                                                                  | X29      | 1965          | 2001                   | NA          | 182                    | 2002                  | 2002                        | 2014                   | 789                                    | ATR                  | 2012                                  |
|                                                                                  | X30      | 1969          | 2011                   | F2          | 364                    | 2012                  | 2012                        | 2014                   | 723                                    | KVX RTV ATV          | 2012                                  |
|                                                                                  | X31      | 1945          | 2000                   | NA          | 141                    | 2000                  | 2000                        | 2014                   | 469                                    | ATR                  | 2010                                  |
|                                                                                  | X32      | 1970          | 2005                   | B           | 291                    | 2005                  | 2012                        | 2014                   | 493                                    | TRU RTV ATV          | 2011                                  |
|                                                                                  | X33      | 1963          | 2005                   | NA          | 237                    | 2005                  | 2008                        | 2014                   | 414                                    | ATR                  | 2009                                  |
|                                                                                  | X34      | 1970          | 2001                   | Not-B       | 264                    | 2002                  | 2007                        | 2014                   | 697                                    | KVX RLT              | 2012                                  |

NA = Non applicable
