# Supplementary material for: Sequential treatment with 5‐aza‐2′‐deoxycytidine and deacetylase inhibitors reactivates HIV‐1
Source: PubMed Central journal article supplement (PMC4734845; doi:10.15252/emmm.201505557), 2015-12-17
Supplement: EMMM-8-117-s002.pdf [file EMMM-8-117-s002.pdf]

## Sequential treatment with 5-aza-2'-deoxycytidine and deacetylase inhibitors reactivates HIV-1

Sophie BOUCHAT, Nadège DELACOURT, Anna KULA, Gilles DARCIS, Benoit VAN DRIESSCHE, Francis CORAZZA, Jean-Stéphane GATOT, Adeline MELARD, Caroline VANHULLE, Kabamba KABEYA, Marion PARDONS, Véronique AVETTAND-FENOEL, Nathan CLUMECK, Stéphane DE WIT, Olivier ROHR, Christine ROUZIOUX, and Carine VAN LINT

*Corresponding author: Van Lint Carine, Université Libre de Bruxelles*

---

**Review timeline:**

Submission date:

19 June 2015

Accepted:

09 November 2015

---

*Editor: Céline Carret*

**Transaction Report:**

No Review Process File is available with this article, as the authors have chosen not to make the review process public in this case
